# Supplementary material for: The live cell DNA stain SiR-Hoechst induces DNA damage responses and impairs cell cycle progression
Source: PubMed Central journal article supplement (PMC5962532; doi:10.1038/s41598-018-26307-6), 2018-05-21
Supplement: 41598_2018_26307_MOESM1_ESM.pdf [file 41598_2018_26307_MOESM1_ESM.pdf]

## Supplemental Information

### **The live cell DNA stain SiR-Hoechst induces DNA damage responses and impairs cell cycle progression**

Onur Sen<sup>1</sup>, Adrian T. Saurin<sup>2</sup> and Jonathan M.G. Higgins<sup>1\*</sup>

<sup>1</sup> Cell Division Biology Group, Institute for Cell and Molecular Biosciences, Newcastle University, Medical School, Framlington Place, Newcastle upon Tyne, NE2 4HH, UK.

<sup>2</sup> Division of Cancer Research, School of Medicine, Jacqui Wood Cancer Centre, Ninewells Hospital and Medical School, University of Dundee, Dundee, DD1 9SY, UK.

\* Correspondence and requests for materials should be addressed to J.M.G.H. (email: [jonathan.higgins@ncl.ac.uk](mailto:jonathan.higgins@ncl.ac.uk))

## Supplemental Table S1

### Concentrations of SiR-Hoechst used in published live imaging studies

| SiR-Hoechst concentration ( $\mu\text{M}$ ) | References            |
|---------------------------------------------|-----------------------|
| 0.05                                        | 21,32                 |
| 0.1                                         | 18,23,29,34           |
| 0.1-0.2                                     | 8,36                  |
| 0.2                                         | 24                    |
| 0.3                                         | 30                    |
| 0.5                                         | 9,11,16,28,33         |
| 1                                           | 7,15,20,35,37         |
| 2                                           | 10,27                 |
| 50                                          | 22                    |
| 90*                                         | 13                    |
| 1000                                        | 25                    |
| Not stated                                  | 5,6,12,14,17,19,26,31 |

\* 1 nl of a 90  $\mu\text{M}$  SiR-Hoechst solution was microinjected into live zebrafish embryos, and is likely to have become diluted approximately 100-fold within the cell(s).

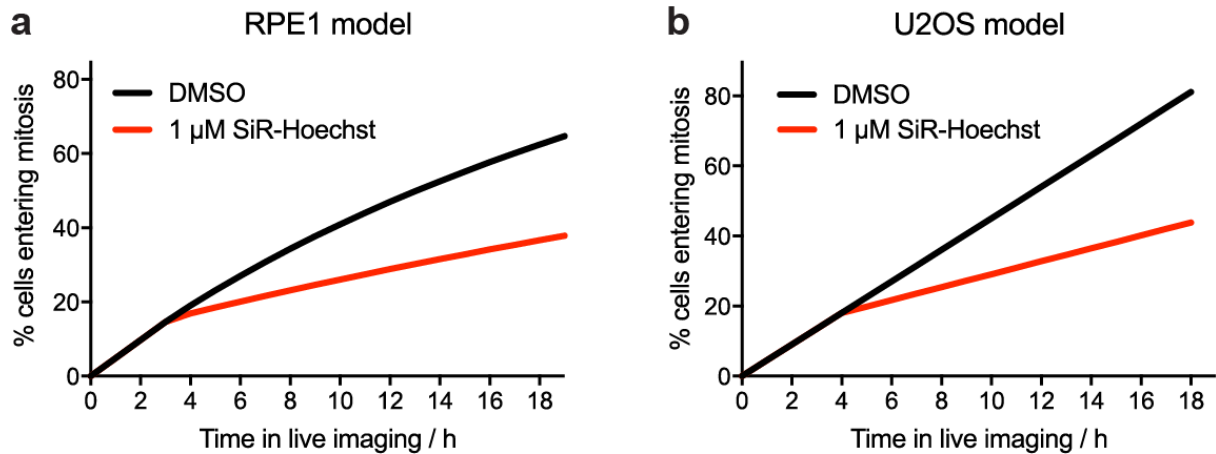

**Supplemental Figure S1. Time course of mitotic entry using a mathematical model of cell cycle progression in the presence of DNA damage.**

The model, described in more detail in Methods, assumes that SiR-Hoechst induces DNA damage during replication in S phase, followed by cell cycle delay or arrest in S/G2.

**a.** To model the progression of RPE1 cells in Figure 1a, we used the following parameters: normal length of cell cycle, 20.6 h (derived from Supplemental Figure 2); length of G2 plus M, 5.2 h (ref 49); imaging damage coefficient, 0.58; pre-incubation time in SiR-Hoechst, 2 h; percentage of cells arresting in G2 in DMSO, 2.1%, and in SiR-Hoechst, 9.1% (determined from non-mitotic G2 import). The model suggests that, for cells that do not arrest in G2, 1  $\mu$ M SiR-Hoechst causes a mean S/G2 delay of 33 h.

**b.** To model the progression of U2OS cells in Figure 1b, we used the following parameters: normal length of cell cycle, 22.2 h (derived from Figure 2b); length of G2 plus M, 6 h (ref 46); imaging damage coefficient, 0; pre-incubation time in SiR-Hoechst, 2 h; percentage of cells arresting in G2, 0% (non-mitotic G2 import is not observed in U2OS cells). The model suggests that 1  $\mu$ M SiR-Hoechst causes a mean S/G2 delay of 32 h.

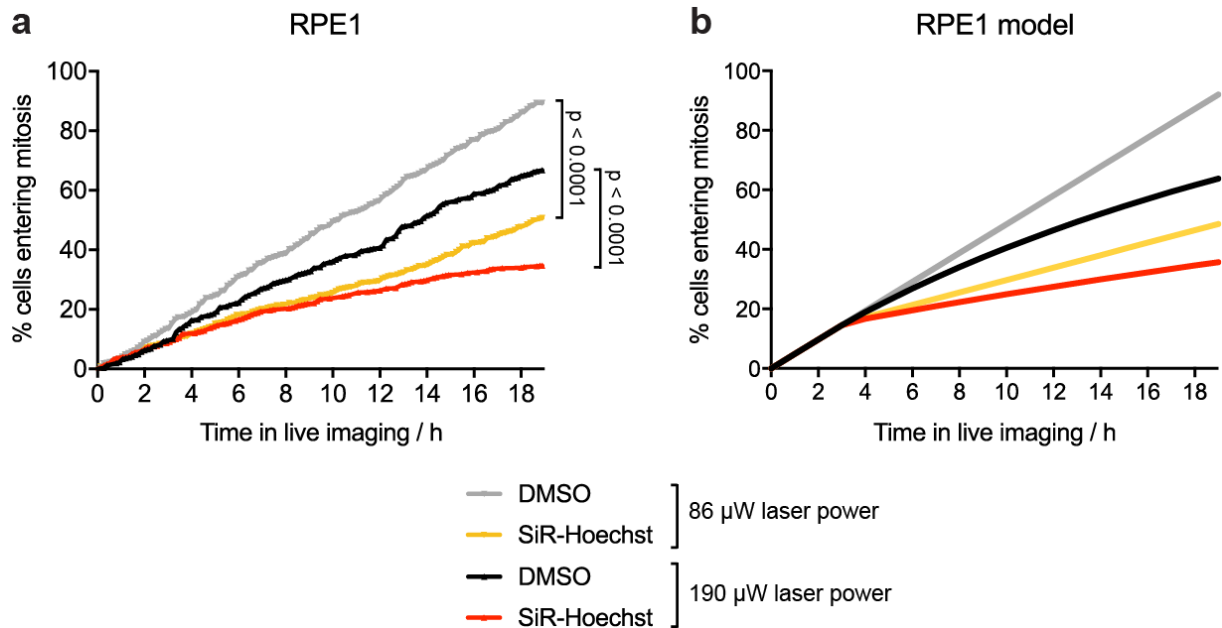

**Supplemental Figure S2. Live imaging in the presence of SiR-Hoechst prevents cell division at different laser illumination intensities.**

**a.** Asynchronous RPE1 cells expressing Cyclin B1-EYFP were treated with DMSO or 1  $\mu$ M SiR-Hoechst for 2 h then imaged for 18.9 h at two different 640 nm laser intensities (*i.e.* SiR-Hoechst excitation) in the continued presence of DMSO or SiR-Hoechst. The time at which cells entered mitosis was defined as described in Methods. In both cases, approximately half as many cells entered mitosis in the presence of 1  $\mu$ M SiR-Hoechst as in its absence. Laser powers recorded at the object are given (see Methods). Between 370 and 501 cells were counted per treatment. Statistical significance was determined using Kaplan-Meier curve analysis and log rank test.

**b.** Time course of mitotic entry using the mathematical model with the following parameters: normal length of cell cycle, 20.6 h (derived from imaging in DMSO at 86  $\mu$ W laser power); length of G2 plus M, 5.2 h (ref 49); imaging damage coefficient, 0 at 86  $\mu$ W and 0.6 at 190  $\mu$ W laser power; pre-incubation time in SiR-Hoechst, 2 h; percentage of cells arresting at G2 in DMSO, 0.23% at 86  $\mu$ W and 2.2% at 190  $\mu$ W; percentage of cells arresting at G2 in 1  $\mu$ M SiR-Hoechst, 4.8% at 86  $\mu$ W and 7.9% at 190  $\mu$ W (determined from imaging of non-mitotic G2 import). The model suggests that, after accounting for the effect of imaging alone, 1  $\mu$ M SiR-Hoechst produces an additional mean S/G2 delay in non-arrested cells of 25 or 40 h at 86 or 190  $\mu$ W laser power, respectively. Therefore, imaging appears to exacerbate the effect of SiR-Hoechst.

## **Supplemental Movies**

### **Movie 1**

hTert-RPE1 cells expressing Cyclin B1-EYFP were treated with DMSO as outlined in Figure 1A and EYFP fluorescence was imaged using an inverted Nikon A1R confocal microscope equipped with a 20x 0.75 NA air objective. The interval between frames is approximately 8 min.

### **Movie 2**

hTert-RPE1 cells expressing Cyclin B1-EYFP were treated with 1  $\mu$ M SiR-Hoechst as outlined in Figure 1A and EYFP and SiR-Hoechst fluorescence was imaged as for Movie 1.

### **Movie 3**

As for Movie 2, but with 0.5  $\mu$ M SiR-Hoechst.

### **Movie 4**

As for Movie 2, but with 0.25  $\mu$ M SiR-Hoechst.

### **Movie 5**

As for Movie 1, but with U2OS cells expressing Cyclin B1-EYFP in the presence of DMSO.

### **Movie 6**

As for Movie 5 (U2OS cells), but with 1  $\mu$ M SiR-Hoechst.
